# Supplementary material for: LPRP: A Gene–Gene Interaction Network Construction Algorithm and Its Application in Breast Cancer Data Analysis
Source: PubMed Central journal article supplement (PMC5838217; doi:10.1007/s12539-016-0185-4), 2016-09-17

## Supplementary material

Journal:

Interdisciplinary Sciences: Computational Life Sciences

Title:

LPRP: a Gene-gene interaction network construction algorithm and its application in breast cancer data analysis

Authors Information:

Lingtao Su<sup>1,2</sup>, Xiangyu Meng (✉)<sup>1,2</sup>, Qingshan Ma<sup>3</sup>, Tian Bai<sup>1,2</sup>, Guixia Liu (✉)<sup>1,2</sup>

1 College of Computer Science and Technology, Jilin University, Changchun, 130012, China

2 Key Laboratory of Symbolic Computation and Knowledge Engineering of Ministry of Education, Jilin University, Changchun 130012, China

3 The First Clinical Hospital of Jilin University, Changchun 130021, China

✉: [liugx@jlu.edu.cn](mailto:liugx@jlu.edu.cn), [sulingtao@163.com](mailto:sulingtao@163.com)

**Table 1 Details of the tumor and normal GGI networks.**

| <b>Tumor GGI<sup>a</sup></b>             | <b>R<sup>b</sup></b> | <b>E-1<sup>c</sup></b> | <b>V-1<sup>d</sup></b> | <b>E-2<sup>e</sup></b> | <b>V-2<sup>f</sup></b> | <b>E-3<sup>g</sup></b> | <b>V-3<sup>h</sup></b> | <b>F<sup>i</sup></b> |
|------------------------------------------|----------------------|------------------------|------------------------|------------------------|------------------------|------------------------|------------------------|----------------------|
| <b>Number of nodes</b>                   | 1917                 | 3779                   | 3779                   | 4678                   | 4678                   | 4757                   | 4757                   | 4757                 |
| <b>Number of edges</b>                   | 4136                 | 5998                   | 6403                   | 7349                   | 7349                   | 7436                   | 7436                   | 7436                 |
| <b>Network diameter</b>                  | 21                   | 22                     | 22                     | 23                     | 23                     | 24                     | 24                     | 24                   |
| <b>Clustering coefficient</b>            | 0.166                | 0.072                  | 0.071                  | 0.07                   | 0.07                   | 0.07                   | 0.07                   | 0.07                 |
| <b>Characteristic path length</b>        | 7.382                | 8.129                  | 8.41                   | 8.53                   | 8.57                   | 8.627                  | 8.627                  | 8.627                |
| <b>Network Figure</b>                    | S25 Fig              | S1 Fig                 |                        | S9 Fig                 |                        | S17 Fig                |                        | S26 Fig              |
| <b>Node degree Distribution</b>          | S25 Fig              | S2 Fig                 |                        | S10 Fig                |                        | S18 Fig                |                        | S26 Fig              |
| <b>Shortest Path Length Distribution</b> | S25 Fig              | S3 Fig                 |                        | S11 Fig                |                        | S19 Fig                |                        | S26 Fig              |

|                                          |          |            |            |            |            |            |            |          |
|------------------------------------------|----------|------------|------------|------------|------------|------------|------------|----------|
| <b>Topological Coefficients</b>          | S25 Fig  | S4 Fig     |            | S12 Fig    |            | S20 Fig    |            | S26 Fig  |
| <b>Normal GGI<sup>j</sup></b>            | <b>R</b> | <b>E-1</b> | <b>V-1</b> | <b>E-2</b> | <b>V-2</b> | <b>E-3</b> | <b>V-3</b> | <b>F</b> |
| <b>Number of nodes</b>                   | 6280     | 6988       | 6988       | 7011       | 7011       | 7015       | 7015       | 7015     |
| <b>Number of edges</b>                   | 65009    | 65717      | 65730      | 65753      | 65753      | 65757      | 65757      | 65757    |
| <b>Network diameter</b>                  | 13       | 13         | 13         | 13         | 13         | 13         | 13         | 13       |
| <b>Clustering coefficient</b>            | 0.255    | 0.223      | 0.223      | 0.223      | 0.223      | 0.223      | 0.223      | 0.223    |
| <b>Characteristic path length</b>        | 3.823    | 4.028      | 0.4030     | 4.031      | 4.035      | 4.045      | 4.046      | 4.048    |
| <b>Network Figure</b>                    | S25 Fig  | S5 Fig     |            | S13 Fig    |            | S21 Fig    |            | S26 Fig  |
| <b>Node degree Distribution</b>          | S25 Fig  | S6 Fig     |            | S14 Fig    |            | S22 Fig    |            | S26 Fig  |
| <b>Shortest Path Length Distribution</b> | S25 Fig  | S7 Fig     |            | S15 Fig    |            | S23 Fig    |            | S26 Fig  |
| <b>Topological Coefficients</b>          | S25 Fig  | S8 Fig     |            | S16 Fig    |            | S24 Fig    |            | S26 Fig  |

In S25 Fig, (a) Network figure of the raw tumor GGI network. (b) Network figure of the raw normal GGI network. (c) Node degree distribution of the raw tumor GGI network. (d) Node degree distribution of the raw normal GGI network. (e) Shortest path length distribution of the raw tumor GGI network. (f) Shortest path length distribution of the raw normal GGI network. (g) Topological coefficients distribution of the raw tumor GGI network. (h) Topological coefficients distribution of the raw normal GGI network.

In S26 Fig, (a), (d), (g), (j) are topological coefficients, shortest path length, network figure and the node degree distribution of a PPI network downloaded from DIP (<http://dip.doe-mpi.ucla.edu/dip/Main.cgi>) database, respectively. <sup>a</sup>**Tumor GGI**: network constructed with the gene interactions detected using the tumor samples. <sup>b</sup>**R**: raw network, <sup>c</sup>**E-1**: network after the first expansion, <sup>d</sup>**V-1**: network after the first revision, <sup>e</sup>**E-2**: network after the second expansion, <sup>f</sup>**V-2**: network after the second revision, <sup>g</sup>**E-3**: network after the third expansion, <sup>h</sup>**V-3**: network after the third revision, <sup>i</sup>**F**: final network. <sup>j</sup>**Normal GGI**: network constructed with the gene interactions detected using the normal samples.

**S1 Fig** Network figure of the tumor GGI network after the first expansion.

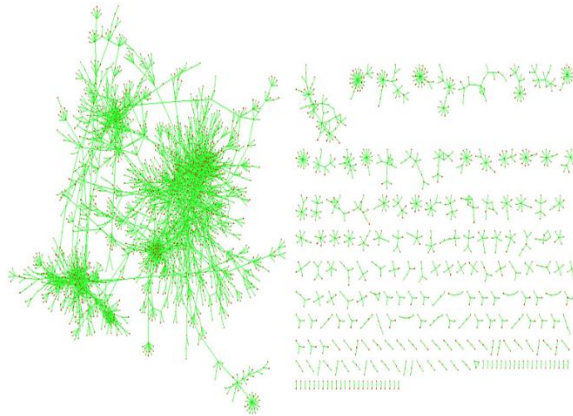

**S2 Fig** Node degree distribution of the tumor GGI network after the first expansion.

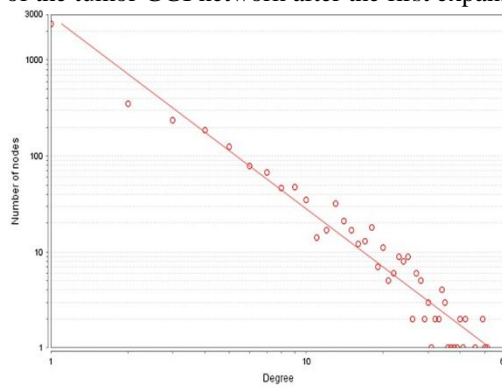

**S3 Fig.** Shortest path length distribution of the tumor GGI network after the first expansion.

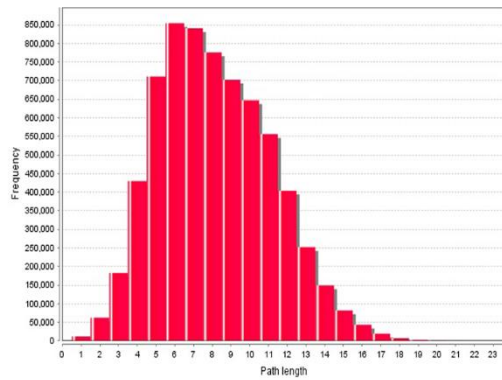

**S4 Fig.** Topological coefficients distribution of the tumor GGI network after the first expansion.

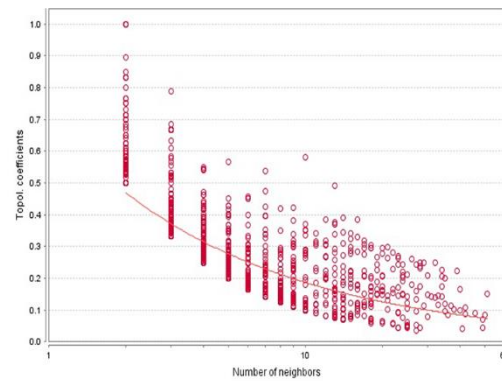

**S5 Fig.** Network figure of the normal GGI network after the first expansion.

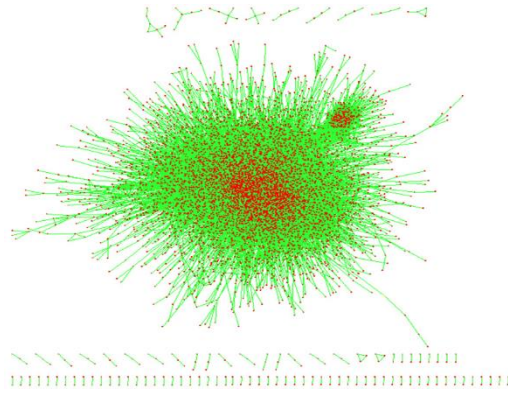

**S6 Fig.** Node degree distribution of the normal GGI network after the first expansion.

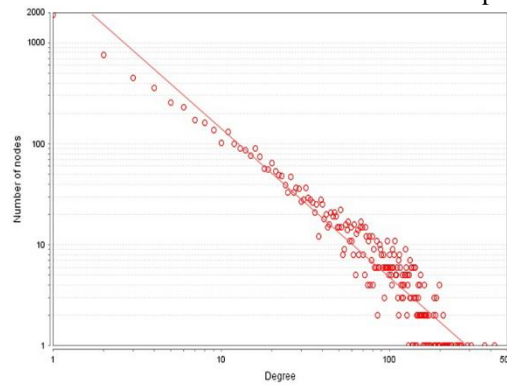

**S7 Fig.** Shortest path length distribution of the normal GGI network after the first expansion.

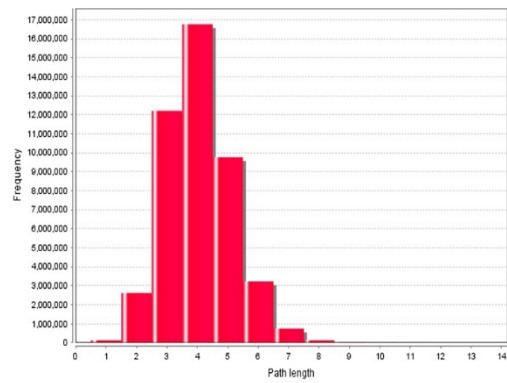

**S8 Fig.** Topological coefficients distribution of the normal GGI network after the first expansion.

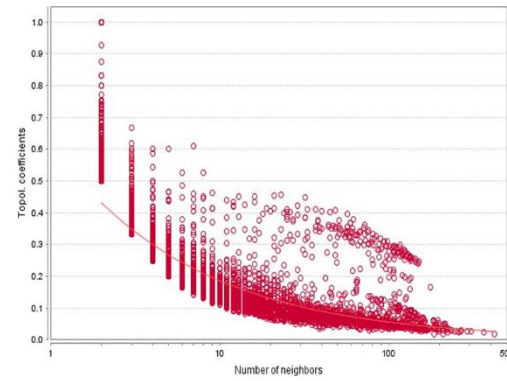

**S9 Fig.** Network figure of the tumor GGI network after the second expansion.

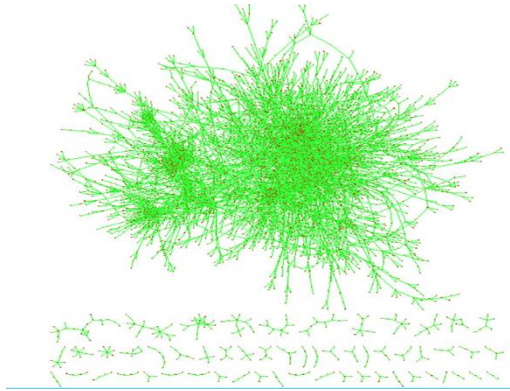

**S10 Fig.** Node degree distribution of the tumor GGI network after the second expansion.

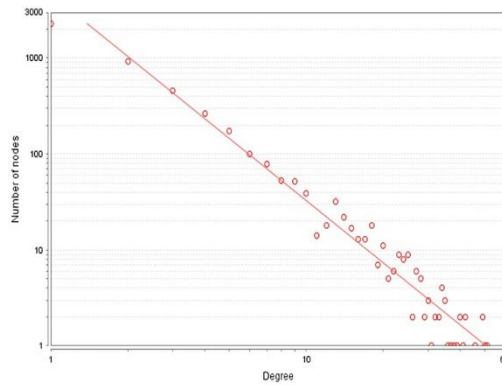

**S11 Fig.** Shortest path length distribution of the tumor GGI network after the second expansion.

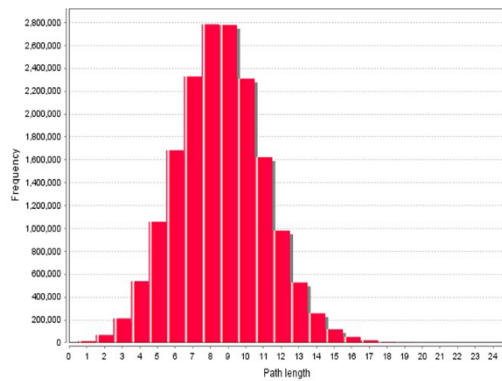

**S12 Fig.** Topological coefficients distribution of the tumor GGI network after the second expansion.

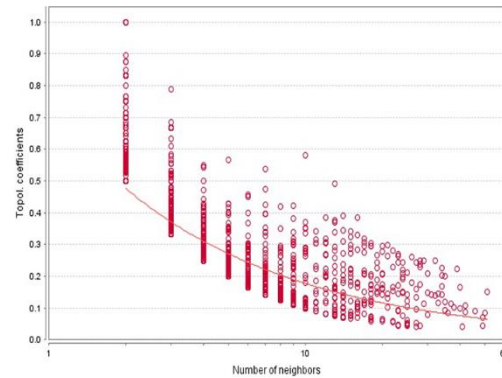

**S13 Fig.** Network figure of the normal GGI network after the second expansion.

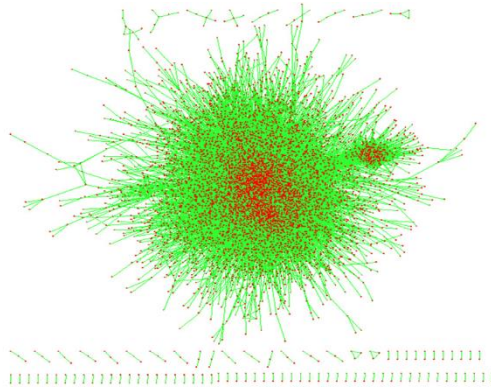

**S14 Fig.** Node degree distribution of the normal GGI network after the second expansion.

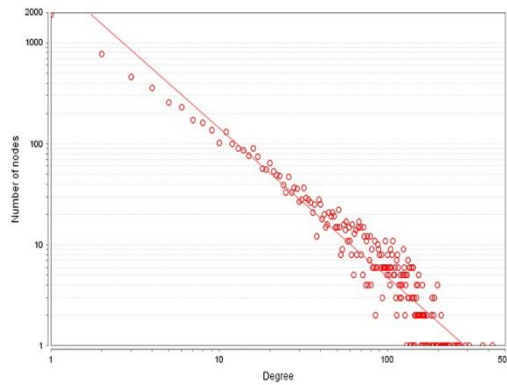

**S15 Fig.** Shortest path length distribution of the normal GGI network after second expansion.

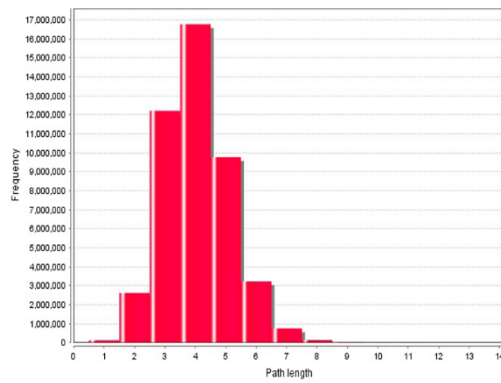

**S16 Fig.** Topological coefficients distribution of the normal GGI network after the second expansion.

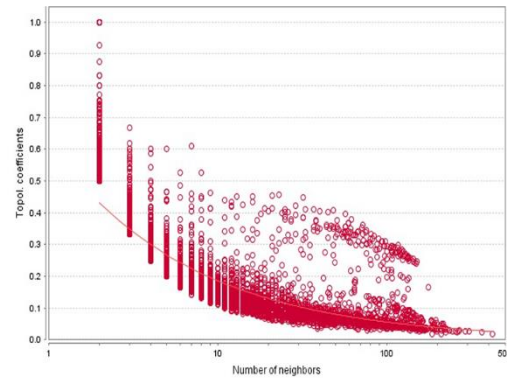

**S17 Fig.** Network figure of the tumor GGI network after the third expansion.

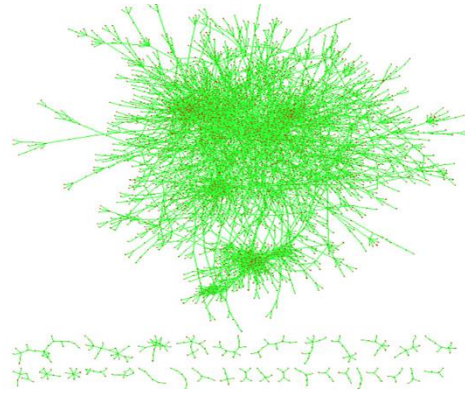

**S18 Fig.** Node degree distribution of the tumor GGI network after the third expansion.

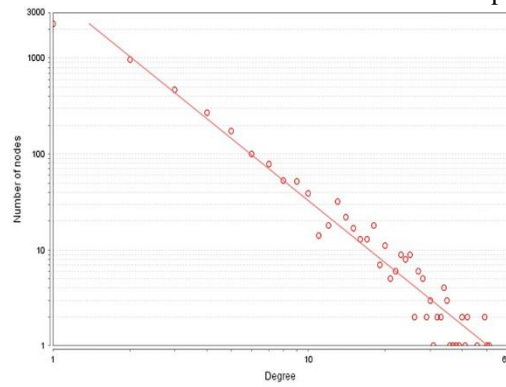

**S19 Fig.** Shortest path length distribution of the tumor GGI network after the third expansion.

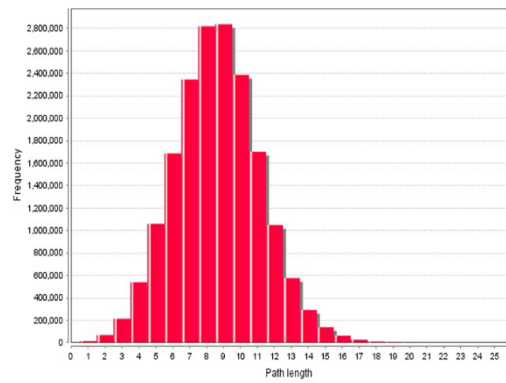

**S20 Fig.** Topological coefficients distribution of the tumor GGI network after the third expansion.

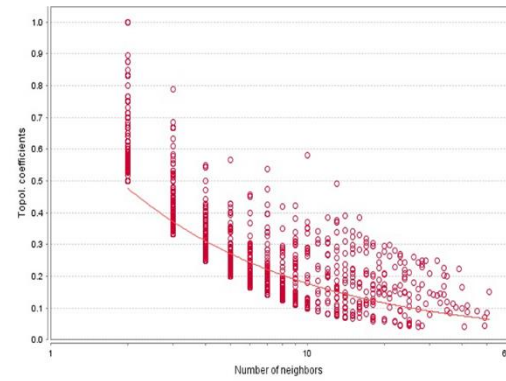

**S21 Fig.** Network figure of the normal GGI network after the third expansion.



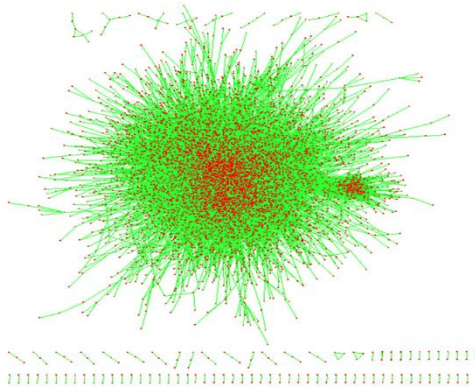

**S22 Fig.** Node degree distribution of the normal GGI network after the third expansion.

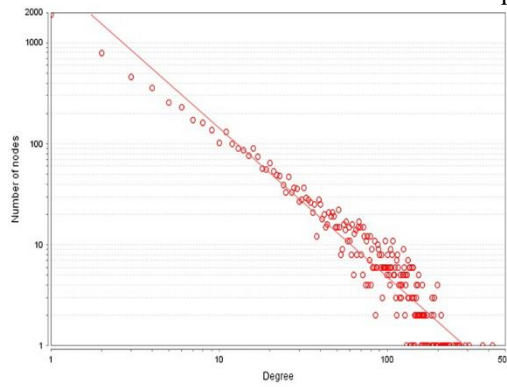

**S23 Fig.** Shortest path length distribution of the normal GGI network after the third expansion.

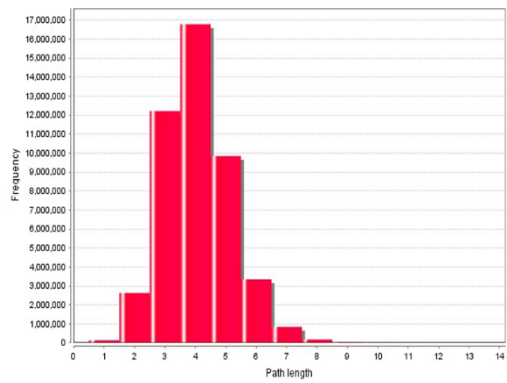

**S24 Fig.** Topological coefficients distribution of the normal GGI network after the third expansion.

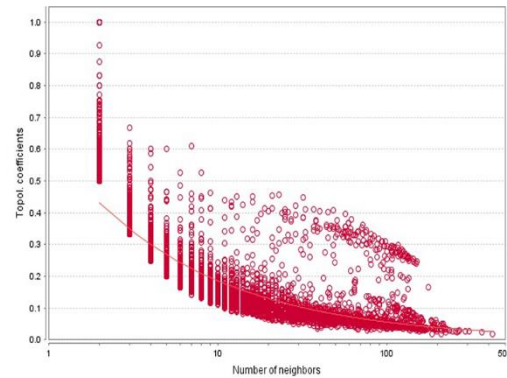

**S24 Fig.** Characteristic comparison of the tumor and normal raw GGI networks.



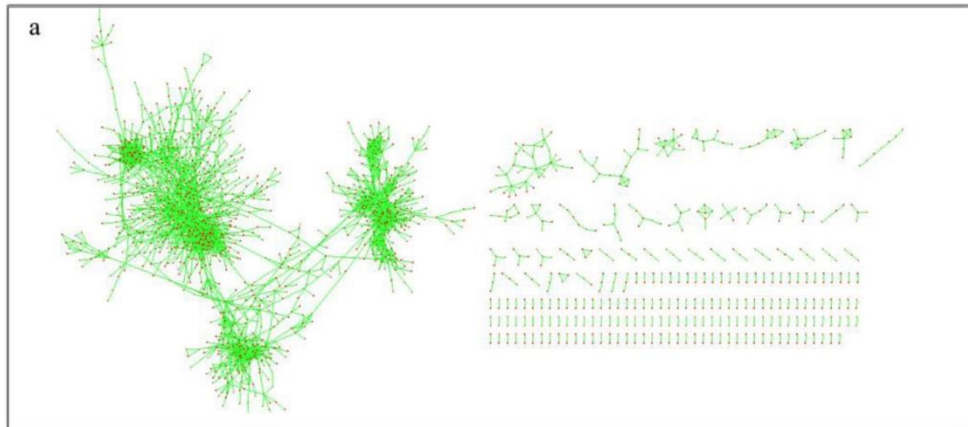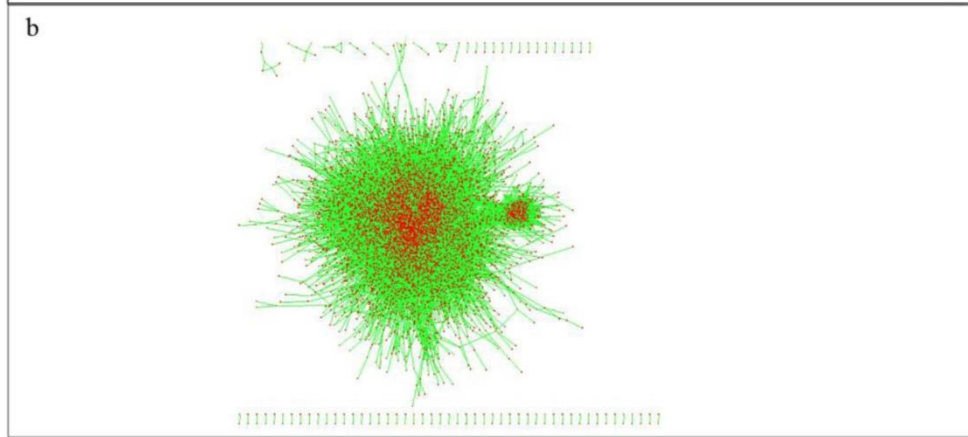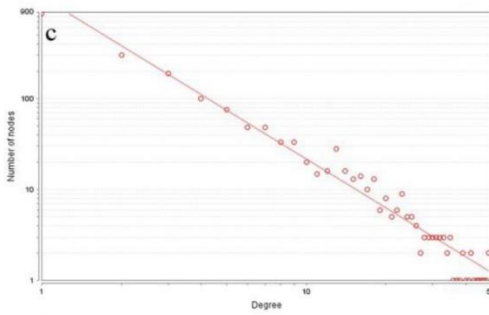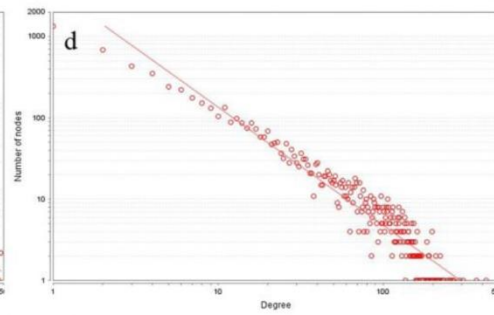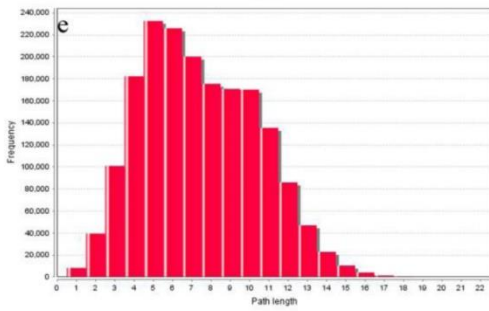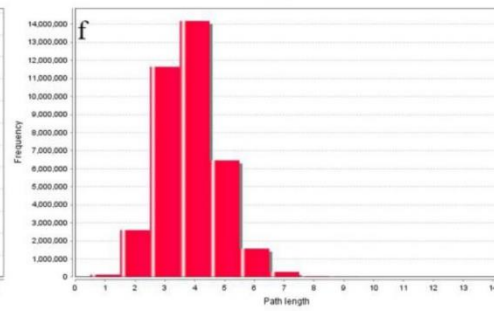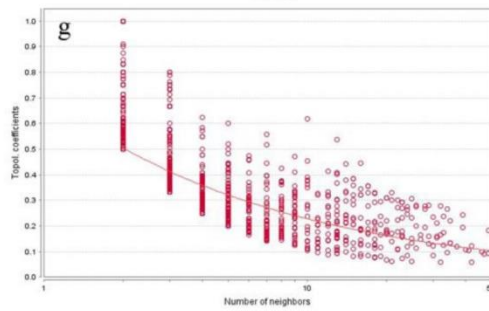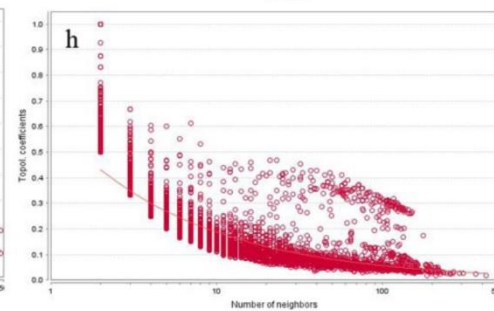

**S26 Fig.** Characteristic comparison of the tumor, normal, and final PPI networks.

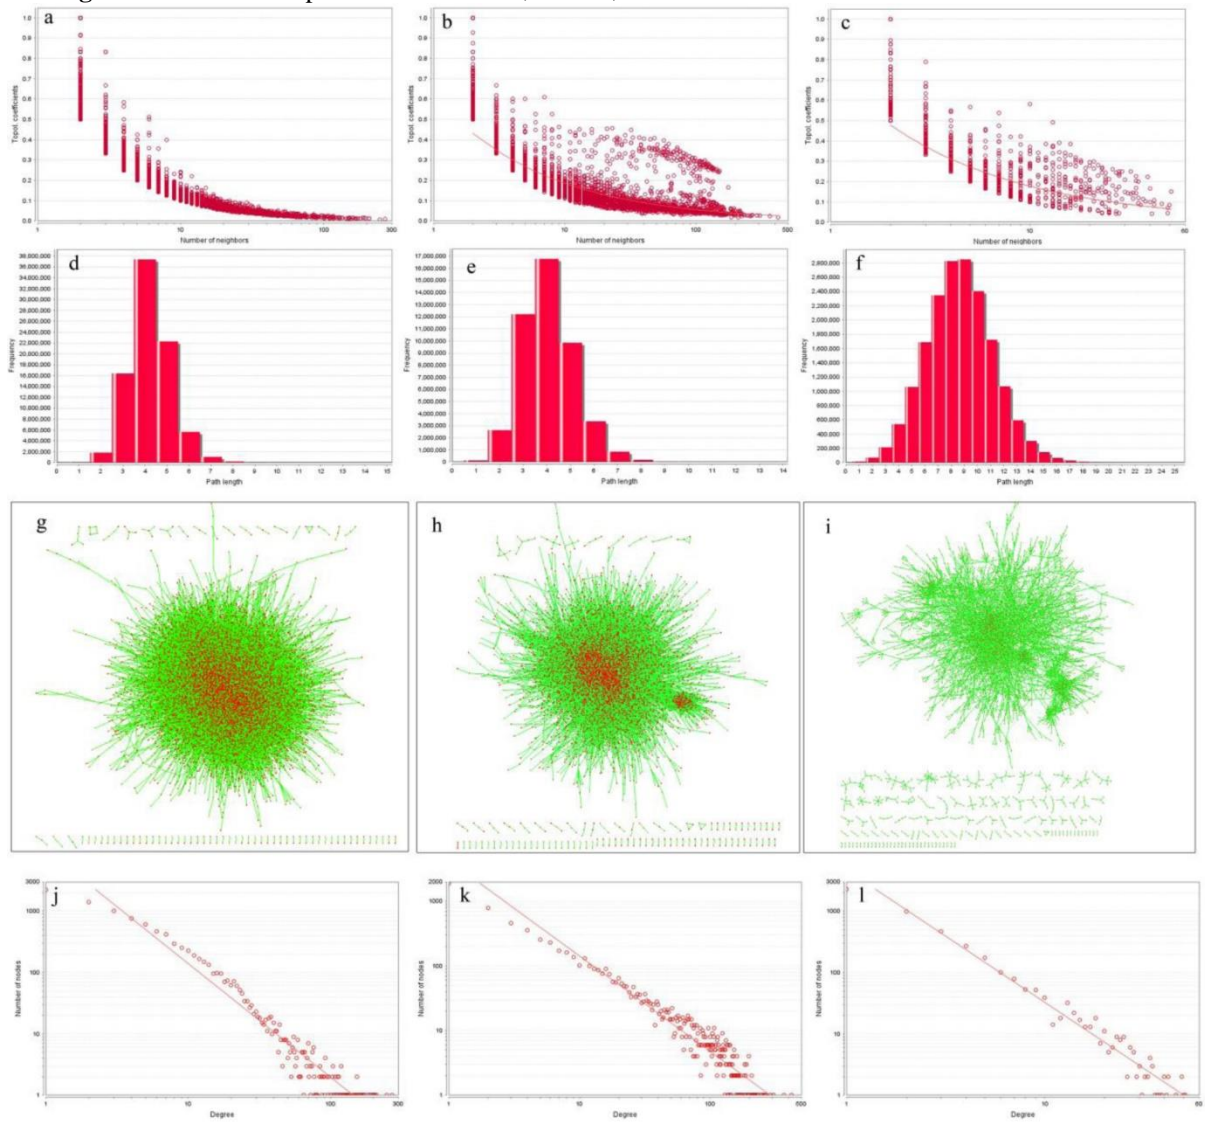

Supplement: 12539_2016_185_MOESM1_ESM.pdf [file 12539_2016_185_MOESM1_ESM.pdf]
